# Supplementary material for: A hybrid blob-slice model for accurate and efficient detection of fluorescence labeled nuclei in 3D
Source: Springer Nature journal article supplement (doi:10.1186/1471-2105-11-580), 2010-11-29

**a**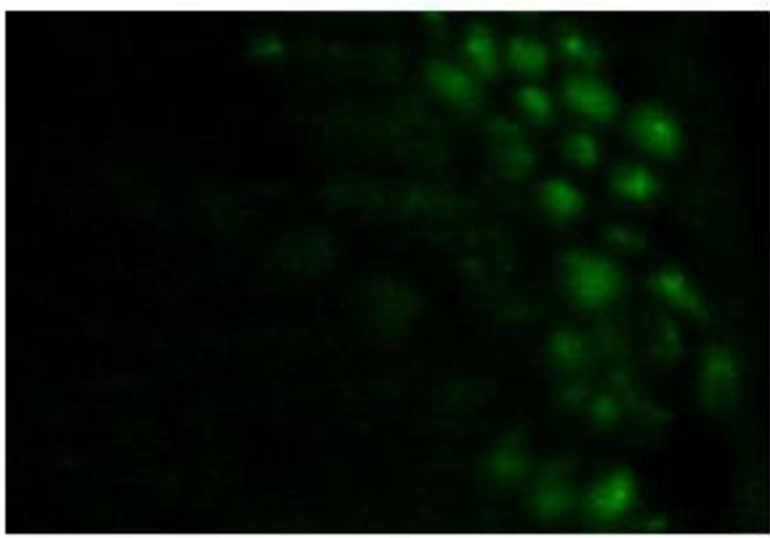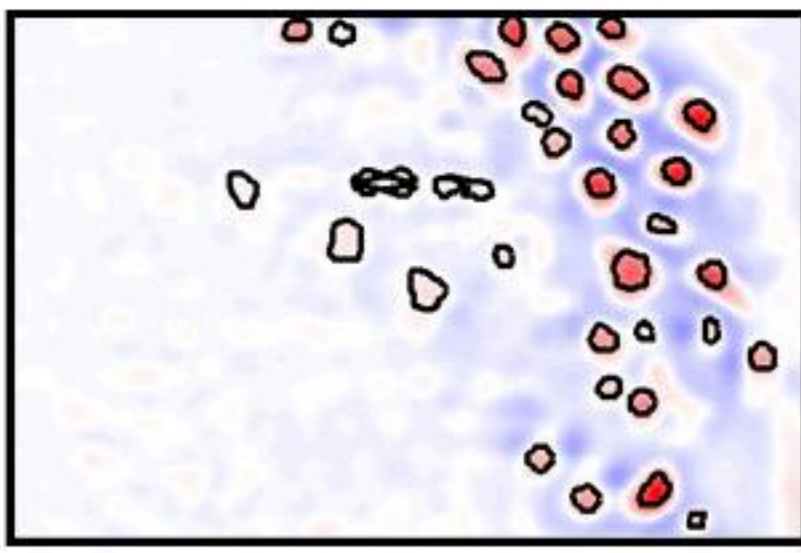**b**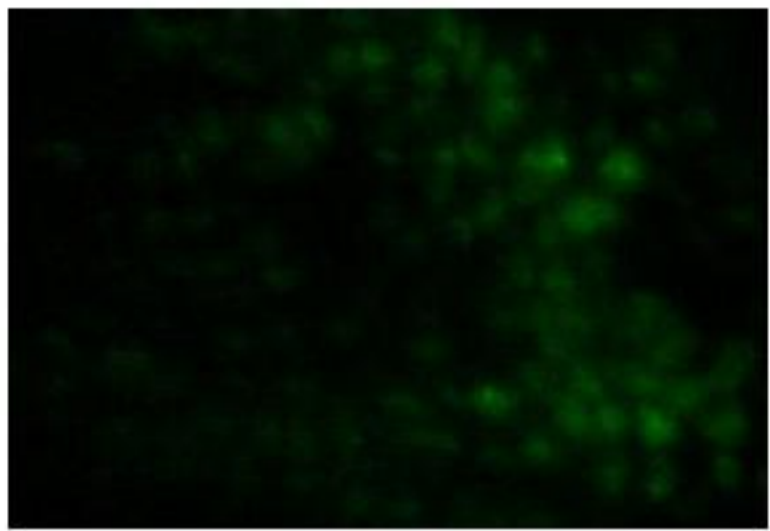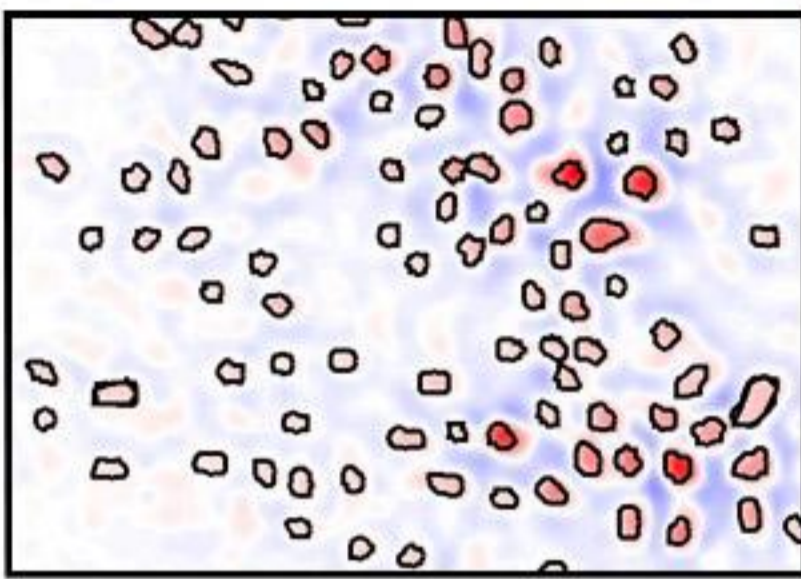**c**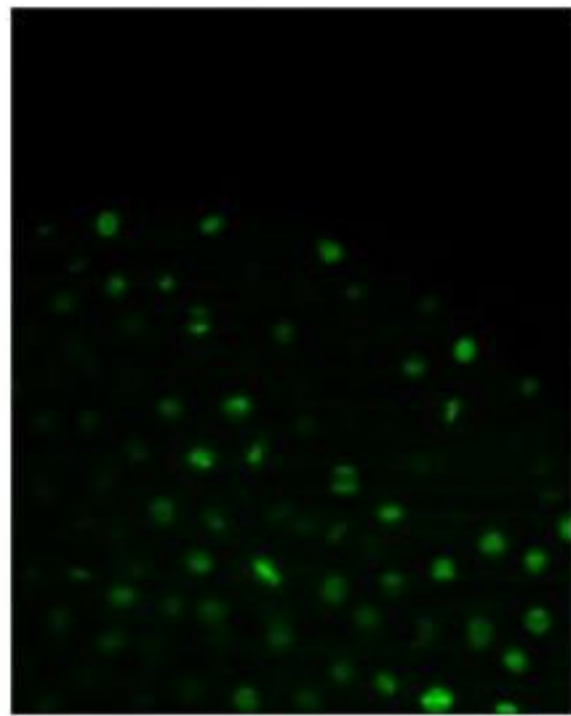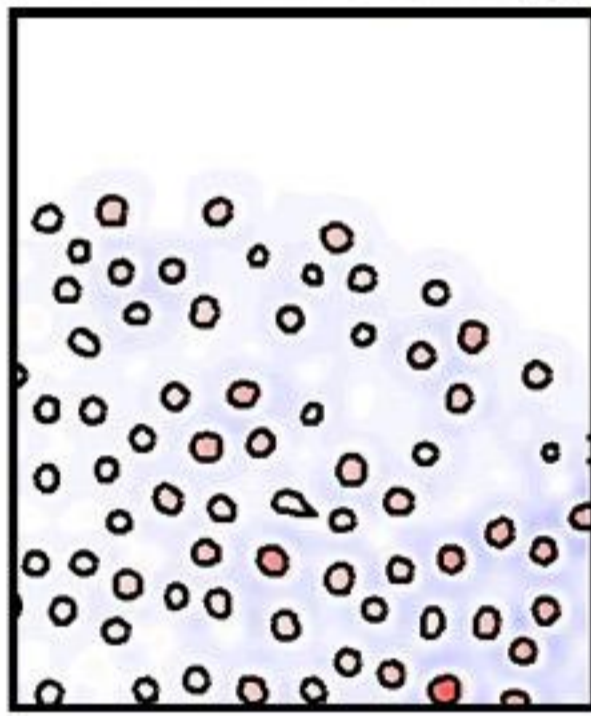**d**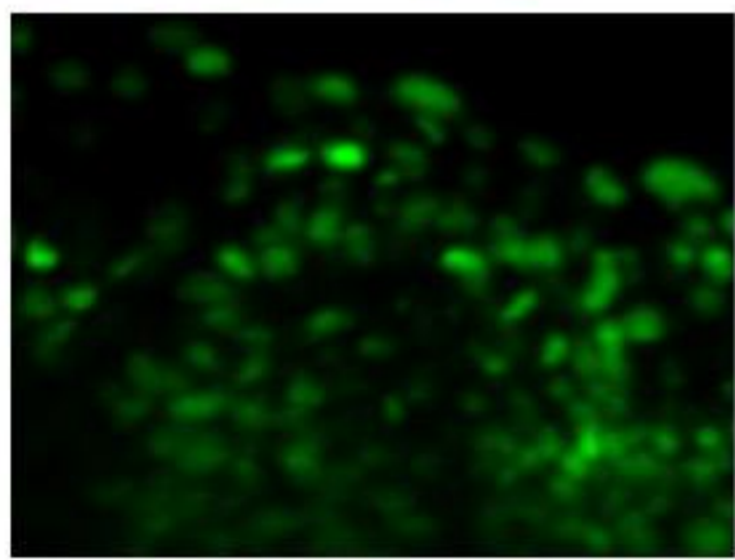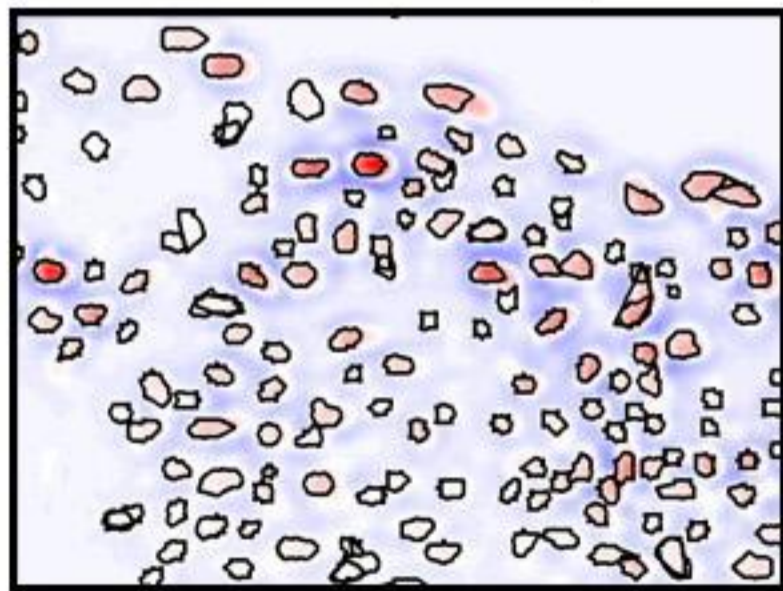**e**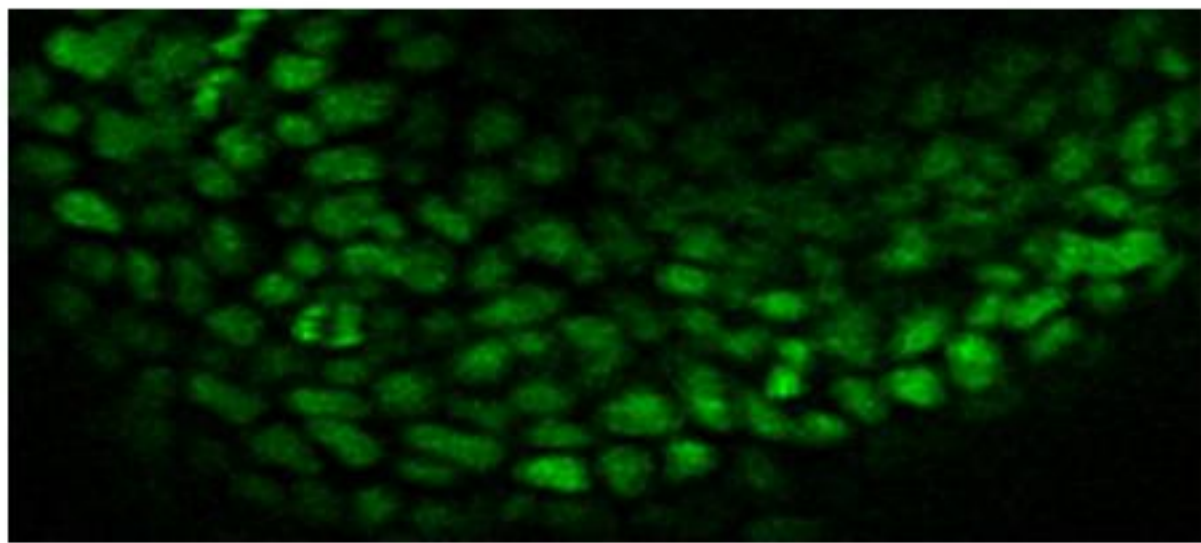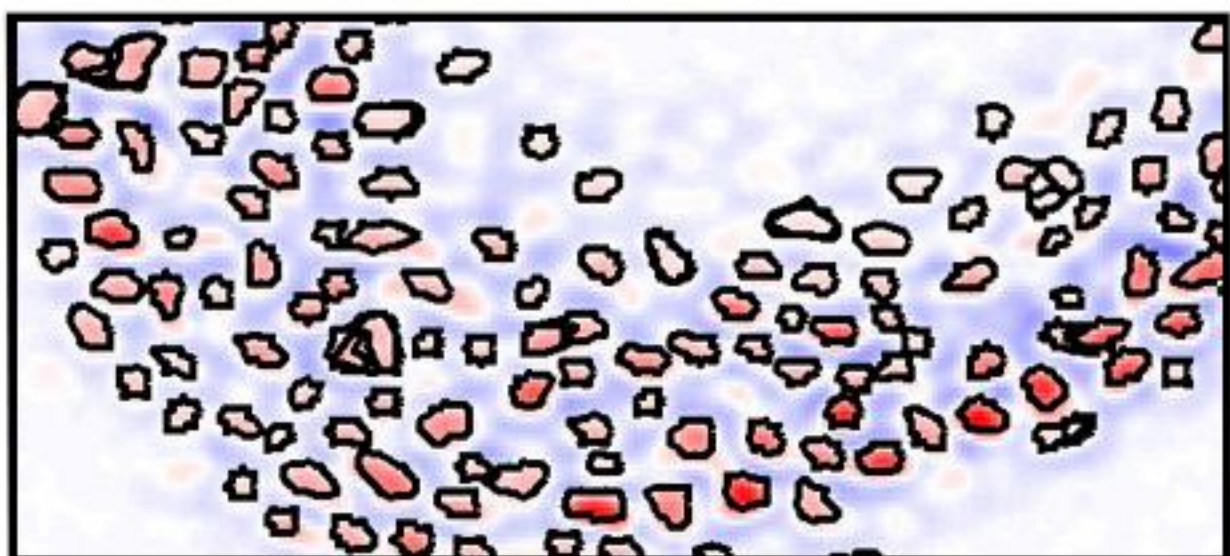

Supplement: 12859_2010_4163_MOESM16_ESM.pdf [file 12859_2010_4163_MOESM16_ESM.pdf]
